# Supplementary material for: Ambient nitrogen dioxide in 47 187 neighbourhoods across 326 cities in eight Latin American countries: population exposures and associations with urban features
Source: PubMed Central journal article supplement (PMC10716820; doi:10.1016/s2542-5196(23)00237-1), 2023-12-04
Supplement: mmc1.pdf [file mmc1.pdf]

# THE LANCET

## Planetary Health

### Supplementary appendix

This appendix formed part of the original submission and has been peer reviewed. We post it as supplied by the authors.

Supplement to: Kephart JL, Gouveia N, Rodríguez DA, et al. Ambient nitrogen dioxide in 47 187 neighbourhoods across 326 cities in eight Latin American countries: population exposures and associations with urban features. *Lancet Planet Health* 2023; 7: e976–84.

**Ambient nitrogen dioxide in 47,187 neighborhoods across 326 cities in eight Latin American countries: population exposures and associations with urban features**

**Supplementary Material**

**Supplemental Table S1: Neighborhood administrative units and years of most recent available census.**

**Supplemental Table S2: Observed neighborhood count and population for 326 study cities.**

**Supplemental Table S3: Sensitivity analysis of multilevel associations between neighborhood NO<sub>2</sub> and urban features, stratified by country.**

**Supplemental Figure S1: Comparison of estimates from main analysis (using available data closest to 2019) with sensitivity analysis (using available data closest to census year).**

**Supplemental Figure S2: Spearman correlation coefficients between variables in multilevel analysis of associations between neighborhood NO<sub>2</sub> and features of the urban environment.**

**Appendix I: Detailed descriptions of urban environmental measures and their interpretation**

**Supplemental Table S1: Neighborhood administrative units and years of most recent available census.**

| <b>Country</b> | <b>Administrative unit<br/>(neighborhood)</b> | <b>Census/population year</b> |
|----------------|-----------------------------------------------|-------------------------------|
| Argentina      | Fraccion Censal                               | 2010                          |
| Brazil         | Áreas de Ponderação                           | 2010                          |
| Chile          | Zona Censal                                   | 2017                          |
| Colombia       | Sector Urbano, Clase = 1                      | 2018                          |
| Costa Rica     | Distrito                                      | 2011                          |
| Guatemala      | Sector Censal                                 | 2002                          |
| Mexico         | Área Geoestadística Básica                    | 2010                          |
| Panama         | Barrio                                        | 2010                          |

**Supplemental Table S2: Observed neighborhood count and population for 326 study cities.**

| Country   | City name                        | Number of neighborhoods observed | Observed city population (census year) | Median neighborhood population |
|-----------|----------------------------------|----------------------------------|----------------------------------------|--------------------------------|
| Argentina | Bahia Blanca                     | 32                               | 301,572                                | 8,720                          |
|           | Buenos Aires                     | 1,261                            | 14,589,040                             | 10,240                         |
|           | Comodoro Rivadavia               | 19                               | 186,583                                | 10,627                         |
|           | Concordia                        | 16                               | 170,033                                | 9,066                          |
|           | Cordoba                          | 120                              | 1,554,755                              | 13,055                         |
|           | Corrientes                       | 23                               | 358,223                                | 16,518                         |
|           | Formosa                          | 22                               | 234,354                                | 7,809                          |
|           | Jujuy                            | 21                               | 317,880                                | 16,969                         |
|           | Mar del Plata                    | 83                               | 618,989                                | 6,917                          |
|           | Rawson-Trelew                    | 13                               | 131,313                                | 12,550                         |
|           | Rio Cuarto                       | 29                               | 246,393                                | 8,487                          |
|           | Rosario                          | 105                              | 1,350,860                              | 13,039                         |
|           | Salta                            | 33                               | 579,665                                | 18,095                         |
|           | San Carlos de Bariloche          | 19                               | 133,500                                | 7,191                          |
|           | San Juan                         | 41                               | 503,946                                | 12,155                         |
|           | San Luis                         | 19                               | 204,019                                | 13,182                         |
|           | San Miguel de Tucuman-Tafi Viejo | 66                               | 994,553                                | 13,591                         |
|           | San Nicolas de los Arroyos       | 21                               | 145,857                                | 8,762                          |
|           | Santa Fe                         | 35                               | 525,093                                | 13,284                         |
|           | Santiago del Estero              | 34                               | 409,404                                | 14,191                         |
|           | Tandil                           | 22                               | 123,871                                | 4,377                          |
|           | Villa Mercedes                   | 18                               | 125,899                                | 5,417                          |
| Brazil    | Alagoinhas                       | 7                                | 141,949                                | 17,151                         |
|           | Anapolis                         | 13                               | 337,888                                | 25,467                         |
|           | Angra dos Reis                   | 7                                | 169,511                                | 19,945                         |
|           | Apucarana                        | 7                                | 120,919                                | 14,107                         |
|           | Aracaju                          | 29                               | 835,816                                | 28,110                         |
|           | Aracatuba                        | 11                               | 181,579                                | 13,996                         |
|           | Araguaina                        | 7                                | 150,484                                | 22,438                         |
|           | Araguari                         | 6                                | 109,801                                | 18,500                         |
|           | Arapiraca                        | 12                               | 214,006                                | 15,554                         |
|           | Arapongas                        | 9                                | 162,012                                | 19,986                         |
|           | Araraquara                       | 17                               | 243,140                                | 14,588                         |
|           | Araras                           | 7                                | 118,843                                | 16,974                         |
|           | Araruama                         | 11                               | 209,093                                | 18,914                         |
|           | Atibaia                          | 8                                | 146,311                                | 14,386                         |
|           | Balneario Camboriu               | 10                               | 170,450                                | 15,271                         |
|           | Barbacena                        | 7                                | 126,284                                | 14,254                         |
|           | Barreiras                        | 7                                | 137,427                                | 18,226                         |

| Country | City name               | Number of neighborhoods observed | Observed city population (census year) | Median neighborhood population |
|---------|-------------------------|----------------------------------|----------------------------------------|--------------------------------|
| Brazil  | Barretos                | 6                                | 112,101                                | 17,976                         |
|         | Bauru                   | 17                               | 343,937                                | 20,070                         |
|         | Belem                   | 65                               | 2,101,883                              | 32,621                         |
|         | Belo Horizonte          | 174                              | 4,707,362                              | 26,724                         |
|         | Bento Goncalves         | 11                               | 163,159                                | 13,814                         |
|         | Birigui                 | 6                                | 108,728                                | 16,865                         |
|         | Blumenau                | 29                               | 486,379                                | 15,648                         |
|         | Boa Vista               | 14                               | 284,313                                | 19,798                         |
|         | Botucatu                | 7                                | 127,328                                | 17,199                         |
|         | Braganca Paulista       | 9                                | 146,744                                | 14,818                         |
|         | Brasilia                | 78                               | 3,187,984                              | 40,502                         |
|         | Brusque                 | 6                                | 123,933                                | 19,340                         |
|         | Cabo Frio               | 14                               | 301,817                                | 19,033                         |
|         | Cachoeiro de Itapemirim | 9                                | 189,889                                | 17,057                         |
|         | Campina Grande          | 25                               | 465,064                                | 16,940                         |
|         | Campinas                | 115                              | 2,814,738                              | 22,178                         |
|         | Campo Grande            | 8                                | 786,797                                | 103,857                        |
|         | Campos dos Goytacazes   | 9                                | 463,731                                | 26,514                         |
|         | Caraguatatuba           | 10                               | 174,782                                | 14,628                         |
|         | Caruaru                 | 12                               | 314,912                                | 15,682                         |
|         | Cascavel                | 17                               | 286,205                                | 15,861                         |
|         | Castanhal               | 8                                | 173,149                                | 17,211                         |
|         | Catanduva               | 7                                | 112,820                                | 14,667                         |
|         | Caxias                  | 7                                | 155,129                                | 17,917                         |
|         | Caxias do Sul           | 27                               | 435,564                                | 14,073                         |
|         | Chapeco                 | 11                               | 183,530                                | 16,573                         |
|         | Conselheiro Lafaiete    | 5                                | 116,512                                | 22,975                         |
|         | Criciuma                | 19                               | 331,281                                | 16,357                         |
|         | Cuiaba                  | 35                               | 803,694                                | 20,735                         |
|         | Curitiba                | 100                              | 2,857,466                              | 28,032                         |
|         | Divinopolis             | 7                                | 213,016                                | 34,904                         |
|         | Dourados                | 10                               | 196,035                                | 18,931                         |
|         | Feira de Santana        | 16                               | 589,925                                | 36,154                         |
|         | Florianopolis           | 57                               | 851,955                                | 13,678                         |
|         | Fortaleza               | 99                               | 3,411,846                              | 32,645                         |
|         | Foz do Iguacu           | 11                               | 256,088                                | 14,910                         |
|         | Franca                  | 21                               | 318,640                                | 14,961                         |
|         | Garanhuns               | 7                                | 129,408                                | 16,084                         |
|         | Goiania                 | 69                               | 2,013,288                              | 29,664                         |
|         | Governador Valadares    | 13                               | 263,689                                | 19,860                         |
|         | Guarapari               | 6                                | 105,286                                | 16,407                         |

| Country | City name         | Number of neighborhoods observed | Observed city population (census year) | Median neighborhood population |
|---------|-------------------|----------------------------------|----------------------------------------|--------------------------------|
| Brazil  | Guarapuava        | 9                                | 167,328                                | 18,607                         |
|         | Guaratingueta     | 11                               | 249,013                                | 19,657                         |
|         | Ilheus            | 9                                | 184,236                                | 18,385                         |
|         | Imperatriz        | 15                               | 290,946                                | 18,209                         |
|         | Ipatinga          | 26                               | 536,909                                | 19,363                         |
|         | Itabira           | 5                                | 109,783                                | 23,020                         |
|         | Itabuna           | 14                               | 204,667                                | 14,584                         |
|         | Itajai            | 16                               | 308,534                                | 16,147                         |
|         | Itapetininga      | 7                                | 144,377                                | 20,768                         |
|         | Jaragua do Sul    | 11                               | 193,611                                | 16,029                         |
|         | Jau               | 7                                | 131,040                                | 16,552                         |
|         | Jequie            | 7                                | 151,895                                | 21,372                         |
|         | Ji-Parana         | 6                                | 116,610                                | 16,053                         |
|         | Joao Pessoa       | 27                               | 1,034,615                              | 26,730                         |
|         | Joinville         | 30                               | 540,098                                | 16,847                         |
|         | Juazeiro do Norte | 21                               | 426,690                                | 17,859                         |
|         | Juiz de Fora      | 14                               | 516,247                                | 35,200                         |
|         | Jundiai           | 34                               | 596,148                                | 15,216                         |
|         | Lages             | 9                                | 156,727                                | 17,793                         |
|         | Limeira           | 7                                | 296,051                                | 43,443                         |
|         | Linhares          | 7                                | 141,306                                | 19,684                         |
|         | Londrina          | 13                               | 651,632                                | 28,202                         |
|         | Macaee            | 12                               | 206,728                                | 16,648                         |
|         | Macapa            | 22                               | 499,466                                | 20,183                         |
|         | Maceio            | 28                               | 1,061,809                              | 32,531                         |
|         | Manaus            | 33                               | 1,802,014                              | 50,359                         |
|         | Maraba            | 4                                | 233,669                                | 57,743                         |
|         | Marilia           | 10                               | 216,745                                | 21,093                         |
|         | Maringa           | 29                               | 507,819                                | 17,076                         |
|         | Mogi Guacu        | 13                               | 233,794                                | 16,622                         |
|         | Montes Claros     | 22                               | 361,915                                | 15,740                         |
|         | Mossoro           | 13                               | 259,815                                | 19,107                         |
|         | Natal             | 43                               | 1,227,675                              | 28,899                         |
|         | Nova Friburgo     | 9                                | 182,082                                | 15,964                         |
|         | Ourinhos          | 5                                | 103,035                                | 20,664                         |
|         | Palmas            | 10                               | 228,332                                | 19,111                         |
|         | Paranagua         | 7                                | 140,469                                | 15,886                         |
|         | Parauapebas       | 7                                | 153,908                                | 21,647                         |
|         | Parnaiba          | 5                                | 145,705                                | 27,949                         |
|         | Parobe            | 8                                | 161,653                                | 19,392                         |
|         | Passo Fundo       | 10                               | 184,826                                | 16,249                         |

| Country | City name             | Number of neighborhoods observed | Observed city population (census year) | Median neighborhood population |
|---------|-----------------------|----------------------------------|----------------------------------------|--------------------------------|
| Brazil  | Passos                | 6                                | 106,290                                | 15,060                         |
|         | Patos de Minas        | 9                                | 138,710                                | 14,087                         |
|         | Pelotas               | 21                               | 352,573                                | 16,052                         |
|         | Petrolina             | 25                               | 491,927                                | 18,274                         |
|         | Petropolis            | 15                               | 295,917                                | 19,105                         |
|         | Piracicaba            | 20                               | 364,571                                | 18,116                         |
|         | Pocos de Caldas       | 9                                | 152,435                                | 13,738                         |
|         | Ponta Grossa          | 15                               | 311,611                                | 21,495                         |
|         | Porto Alegre          | 163                              | 3,581,951                              | 19,206                         |
|         | Porto Seguro          | 7                                | 126,929                                | 16,062                         |
|         | Porto Velho           | 23                               | 448,306                                | 18,202                         |
|         | Pouso Alegre          | 6                                | 130,615                                | 18,675                         |
|         | Presidente Prudente   | 13                               | 231,123                                | 15,309                         |
|         | Recife                | 116                              | 3,513,174                              | 29,687                         |
|         | Resende               | 8                                | 165,144                                | 18,708                         |
|         | Ribeirao Preto        | 19                               | 604,682                                | 31,546                         |
|         | Rio Branco            | 8                                | 336,038                                | 42,495                         |
|         | Rio Claro             | 11                               | 207,887                                | 17,868                         |
|         | Rio Grande            | 11                               | 197,228                                | 15,784                         |
|         | Rio Verde             | 8                                | 176,424                                | 18,367                         |
|         | Rio das Ostras        | 9                                | 141,023                                | 13,287                         |
|         | Rio de Janeiro        | 332                              | 11,737,101                             | 27,907                         |
|         | Rondonopolis          | 11                               | 195,476                                | 16,522                         |
|         | Salvador              | 88                               | 3,200,122                              | 29,702                         |
|         | Santa Cruz do Sul     | 6                                | 118,374                                | 17,359                         |
|         | Santa Maria           | 16                               | 261,031                                | 14,007                         |
|         | Santarem              | 11                               | 294,580                                | 28,791                         |
|         | Santos                | 59                               | 1,616,491                              | 24,946                         |
|         | Sao Carlos            | 14                               | 221,950                                | 14,376                         |
|         | Sao Jose do Rio Preto | 27                               | 484,625                                | 16,982                         |
|         | Sao Jose dos Campos   | 25                               | 925,887                                | 30,461                         |
|         | Sao Luis              | 41                               | 1,309,330                              | 32,946                         |
|         | Sao Paulo             | 621                              | 19,411,753                             | 30,332                         |
|         | Sertaozinho           | 6                                | 110,074                                | 16,290                         |
|         | Sete Lagoas           | 13                               | 214,152                                | 15,963                         |
|         | Sobral                | 9                                | 188,233                                | 18,143                         |
|         | Sorocaba              | 26                               | 722,733                                | 27,540                         |
|         | Tatui                 | 4                                | 107,326                                | 29,668                         |
|         | Taubate               | 23                               | 466,665                                | 16,656                         |
|         | Teixeira de Freitas   | 6                                | 138,341                                | 20,102                         |
|         | Teofilo Otoni         | 6                                | 134,745                                | 21,714                         |

| Country                 | City name              | Number of neighborhoods observed | Observed city population (census year) | Median neighborhood population |       |
|-------------------------|------------------------|----------------------------------|----------------------------------------|--------------------------------|-------|
| Brazil                  | Teresina               | 23                               | 969,690                                | 31,055                         |       |
|                         | Teresopolis            | 9                                | 163,746                                | 15,025                         |       |
|                         | Toledo                 | 7                                | 119,313                                | 13,813                         |       |
|                         | Tubarao                | 8                                | 129,544                                | 13,938                         |       |
|                         | Uberaba                | 16                               | 295,988                                | 18,179                         |       |
|                         | Uberlandia             | 17                               | 604,013                                | 32,159                         |       |
|                         | Uruguaiana             | 6                                | 125,435                                | 16,676                         |       |
|                         | Varginha               | 7                                | 123,081                                | 17,021                         |       |
|                         | Vitoria                | 72                               | 1,565,393                              | 19,349                         |       |
|                         | Vitoria da Conquista   | 14                               | 306,866                                | 21,101                         |       |
|                         | Vitoria de Santo Antao | 6                                | 129,974                                | 23,816                         |       |
|                         | Volta Redonda          | 26                               | 553,113                                | 20,032                         |       |
|                         | Chile                  | Antofagasta                      | 39                                     | 175,736                        | 4,201 |
|                         |                        | Arica                            | 48                                     | 148,845                        | 2,799 |
| Calama                  |                        | 17                               | 82,407                                 | 4,853                          |       |
| Chillan                 |                        | 17                               | 64,808                                 | 3,884                          |       |
| Concepcion              |                        | 70                               | 244,589                                | 3,396                          |       |
| Copiapo                 |                        | 28                               | 103,977                                | 3,612                          |       |
| Curico                  |                        | 15                               | 51,364                                 | 2,977                          |       |
| Iquique                 |                        | 43                               | 183,465                                | 4,351                          |       |
| La Serena-Coquimbo      |                        | 33                               | 145,735                                | 4,475                          |       |
| Los Angeles             |                        | 11                               | 46,679                                 | 3,827                          |       |
| Osorno                  |                        | 12                               | 42,874                                 | 3,339                          |       |
| Puerto Montt            |                        | 19                               | 54,339                                 | 2,995                          |       |
| Punta Arenas            |                        | 37                               | 114,473                                | 3,035                          |       |
| Quillota                |                        | 9                                | 32,508                                 | 3,433                          |       |
| Rancagua                |                        | 22                               | 74,257                                 | 2,957                          |       |
| San Antonio             |                        | 6                                | 23,025                                 | 3,731                          |       |
| Santiago                |                        | 168                              | 679,962                                | 4,061                          |       |
| Talca                   |                        | 23                               | 76,911                                 | 3,349                          |       |
| Temuco                  |                        | 24                               | 83,093                                 | 2,867                          |       |
| Valdivia                |                        | 23                               | 86,121                                 | 3,719                          |       |
| Valparaiso-Vina del Mar | 80                     | 244,530                          | 3,215                                  |                                |       |
| Colombia                | Armenia                | 71                               | 269,254                                | 2,242                          |       |
|                         | Barrancabermeja        | 68                               | 147,544                                | 1,700                          |       |
|                         | Barranquilla           | 197                              | 1,615,325                              | 6,489                          |       |
|                         | Bogota                 | 518                              | 5,542,505                              | 8,392                          |       |
|                         | Bucaramanga            | 122                              | 777,270                                | 5,120                          |       |
|                         | Buenaventura           | 57                               | 324,207                                | 3,283                          |       |
|                         | Buga                   | 21                               | 86,086                                 | 3,739                          |       |
| Cali                    | 363                    | 2,174,657                        | 3,929                                  |                                |       |



| Country       | City name          | Number of neighborhoods observed | Observed city population (census year) | Median neighborhood population |
|---------------|--------------------|----------------------------------|----------------------------------------|--------------------------------|
| Colombia      | Cartagena          | 116                              | 711,222                                | 4,944                          |
|               | Cartago            | 20                               | 101,209                                | 2,743                          |
|               | Cucuta             | 142                              | 615,901                                | 3,218                          |
|               | Duitama            | 15                               | 90,794                                 | 5,875                          |
|               | Florencia          | 34                               | 137,896                                | 3,270                          |
|               | Fusagasuga         | 15                               | 107,259                                | 5,713                          |
|               | Girardot           | 36                               | 93,478                                 | 1,844                          |
|               | Ibague             | 70                               | 420,249                                | 4,138                          |
|               | Manizales          | 98                               | 372,114                                | 2,839                          |
|               | Medellin           | 362                              | 3,074,734                              | 6,738                          |
|               | Monteria           | 58                               | 344,927                                | 4,018                          |
|               | Neiva              | 88                               | 319,335                                | 2,460                          |
|               | Palmira            | 48                               | 249,493                                | 4,340                          |
|               | Pasto              | 39                               | 383,846                                | 9,523                          |
|               | Pereira            | 47                               | 525,248                                | 11,430                         |
|               | Popayan            | 32                               | 258,653                                | 7,891                          |
|               | Quibdo             | 8                                | 15,332                                 | 714                            |
|               | Riohacha           | 60                               | 152,530                                | 1,670                          |
|               | Santa Marta        | 102                              | 433,784                                | 2,374                          |
|               | Sogamoso           | 17                               | 120,320                                | 6,553                          |
| Tulua         | 58                 | 161,534                          | 1,554                                  |                                |
| Tunja         | 29                 | 152,868                          | 4,835                                  |                                |
| Valledupar    | 86                 | 308,771                          | 1,303                                  |                                |
| Villavicencio | 41                 | 276,567                          | 4,733                                  |                                |
| Yopal         | 28                 | 75,543                           | 913                                    |                                |
| Costa Rica    | San Jose           | 169                              | 2,207,560                              | 9,727                          |
| Guatemala     | Guatemala City     | 3,602                            | 2,458,830                              | 663                            |
|               | Quetzaltenango     | 250                              | 201,801                                | 803                            |
| Mexico        | Acapulco de Juarez | 519                              | 863,346                                | 1,279                          |
|               | Acayucan           | 59                               | 112,996                                | 998                            |
|               | Acuna              | 108                              | 136,755                                | 1,176                          |
|               | Aguascalientes     | 327                              | 932,369                                | 2,285                          |
|               | Campeche           | 124                              | 259,005                                | 1,812                          |
|               | Cancun             | 361                              | 676,832                                | 1,498                          |
|               | Celaya             | 435                              | 775,761                                | 439                            |
|               | Chetumal           | 147                              | 244,553                                | 1,078                          |
|               | Chihuahua          | 639                              | 852,527                                | 1,227                          |
|               | Chilpancingo       | 191                              | 241,717                                | 560                            |
|               | Ciudad Valles      | 111                              | 167,680                                | 1,102                          |
|               | Ciudad del Carmen  | 74                               | 221,094                                | 2,584                          |
|               | Coatzacoalcos      | 143                              | 346,177                                | 2,337                          |

| Country | City name          | Number of neighborhoods observed | Observed city population (census year) | Median neighborhood population |
|---------|--------------------|----------------------------------|----------------------------------------|--------------------------------|
| Mexico  | Colima             | 237                              | 334,240                                | 1,241                          |
|         | Cordoba            | 113                              | 316,032                                | 2,070                          |
|         | Cuauhtemoc         | 134                              | 154,639                                | 904                            |
|         | Cuautla            | 236                              | 434,147                                | 1,207                          |
|         | Cuernavaca         | 456                              | 924,964                                | 1,709                          |
|         | Culiacan           | 441                              | 858,638                                | 1,677                          |
|         | Delicias           | 103                              | 137,935                                | 913                            |
|         | Durango            | 384                              | 582,264                                | 1,092                          |
|         | Ensenada           | 336                              | 466,814                                | 981                            |
|         | Fresnillo          | 186                              | 213,139                                | 398                            |
|         | Guadalajara        | 1,677                            | 4,434,866                              | 2,456                          |
|         | Guanajuato         | 115                              | 171,706                                | 629                            |
|         | Guaymas            | 169                              | 203,419                                | 954                            |
|         | Hermosillo         | 518                              | 784,339                                | 1,121                          |
|         | Hidalgo del Parral | 76                               | 107,061                                | 1,460                          |
|         | Iguala             | 159                              | 140,363                                | 367                            |
|         | Irapuato           | 166                              | 529,440                                | 2,172                          |
|         | Juarez             | 606                              | 1,328,636                              | 1,929                          |
|         | La Paz             | 228                              | 251,871                                | 721                            |
|         | La Piedad          | 96                               | 249,512                                | 1,256                          |
|         | Leon               | 598                              | 1,609,393                              | 1,932                          |
|         | Los Mochis         | 245                              | 416,299                                | 1,235                          |
|         | Manzanillo         | 118                              | 155,537                                | 954                            |
|         | Matamoros          | 290                              | 489,190                                | 1,414                          |
|         | Mazatlan           | 233                              | 438,434                                | 1,749                          |
|         | Merida             | 557                              | 973,031                                | 1,590                          |
|         | Mexicali           | 463                              | 936,826                                | 1,637                          |
|         | Mexico City        | 5,687                            | 20,116,842                             | 3,179                          |
|         | Minatitlan         | 140                              | 356,137                                | 2,063                          |
|         | Monclova           | 205                              | 317,313                                | 1,499                          |
|         | Monterrey          | 1,644                            | 4,161,267                              | 2,414                          |
|         | Morelia            | 391                              | 829,622                                | 1,598                          |
|         | Navojoa            | 98                               | 157,729                                | 1,183                          |
|         | Nogales            | 167                              | 220,292                                | 940                            |
|         | Nuevo Laredo       | 226                              | 384,030                                | 1,390                          |
|         | Oaxaca de Juarez   | 375                              | 607,963                                | 1,553                          |
|         | Obregon            | 254                              | 409,310                                | 1,083                          |
|         | Ocotlan            | 80                               | 141,375                                | 1,068                          |
|         | Orizaba            | 192                              | 427,406                                | 1,871                          |
|         | Pachuca de Soto    | 360                              | 512,196                                | 1,077                          |
|         | Piedras Negras     | 156                              | 180,734                                | 1,036                          |

| Country | City name                  | Number of neighborhoods observed | Observed city population (census year) | Median neighborhood population |
|---------|----------------------------|----------------------------------|----------------------------------------|--------------------------------|
| Mexico  | Playa del Carmen           | 95                               | 159,310                                | 998                            |
|         | Poza Rica de Hidalgo       | 215                              | 513,518                                | 1,657                          |
|         | Puebla de Zaragoza         | 1,078                            | 2,855,849                              | 2,395                          |
|         | Puerto Vallarta            | 323                              | 379,886                                | 769                            |
|         | Queretaro                  | 400                              | 1,097,025                              | 2,097                          |
|         | Reynosa                    | 392                              | 727,147                                | 1,489                          |
|         | Rio Verde                  | 48                               | 135,452                                | 1,451                          |
|         | Salamanca                  | 92                               | 260,732                                | 1,930                          |
|         | Saltillo                   | 393                              | 823,128                                | 1,873                          |
|         | San Cristobal de las Casas | 63                               | 185,914                                | 2,616                          |
|         | San Francisco del Rincon   | 74                               | 182,365                                | 710                            |
|         | San Juan Bautista Tuxtepec | 57                               | 155,766                                | 1,798                          |
|         | San Juan del Rio           | 93                               | 241,699                                | 1,907                          |
|         | San Luis Potosi            | 389                              | 1,040,443                              | 2,590                          |
|         | San Luis Rio Colorado      | 232                              | 178,380                                | 786                            |
|         | Santo Domingo Tehuantepec  | 117                              | 161,337                                | 1,185                          |
|         | Tampico                    | 405                              | 859,416                                | 1,910                          |
|         | Tapachula                  | 164                              | 320,451                                | 1,267                          |
|         | Tecoman                    | 100                              | 141,421                                | 1,277                          |
|         | Tehuacan                   | 127                              | 296,899                                | 2,149                          |
|         | Tepic                      | 206                              | 429,351                                | 1,809                          |
|         | Teziutlan                  | 41                               | 122,500                                | 2,339                          |
|         | Tianguistenco              | 57                               | 157,944                                | 1,811                          |
|         | Tijuana                    | 701                              | 1,751,430                              | 2,261                          |
|         | Tlaxcala                   | 302                              | 499,567                                | 1,365                          |
|         | Toluca                     | 566                              | 2,014,091                              | 2,752                          |
|         | Torreon                    | 672                              | 1,215,814                              | 1,507                          |
|         | Tula de Allende            | 161                              | 286,424                                | 1,250                          |
|         | Tulancingo de Bravo        | 125                              | 239,579                                | 1,344                          |
|         | Tuxtla Gutierrez           | 266                              | 684,156                                | 2,331                          |
|         | Uriangato                  | 119                              | 108,669                                | 96                             |
|         | Uruapan                    | 163                              | 315,350                                | 1,616                          |
|         | Veracruz                   | 368                              | 811,671                                | 1,977                          |
|         | Victoria                   | 176                              | 321,953                                | 1,603                          |
|         | Villahermosa               | 177                              | 755,425                                | 3,012                          |
|         | Xalapa                     | 246                              | 666,532                                | 2,226                          |
|         | Zacatecas                  | 303                              | 309,660                                | 735                            |
|         | Zamora                     | 119                              | 250,113                                | 1,862                          |
| Panama  | Colon                      | 160                              | 200,278                                | 543                            |
|         | David                      | 304                              | 196,983                                | 290                            |
|         | Panama City                | 1,087                            | 1,391,754                              | 549                            |

**Supplemental Table S3: Sensitivity analysis of multilevel associations between neighborhood NO<sub>2</sub> and urban features, stratified by country.** Mean differences in neighborhood ambient NO<sub>2</sub> concentration (ppb) associated with a one-unit z-score increase in neighborhood- and city-level features in five countries in Latin America. Guatemala, Costa Rica, and Panama are not included due to the small number of cities ( $\leq 3$ ) in each of these countries.

|                    | All Countries<br>(main analysis) | Brazil                                    | Argentina                                 | Chile                                     | Colombia                                  | Mexico                                    |                                           |
|--------------------|----------------------------------|-------------------------------------------|-------------------------------------------|-------------------------------------------|-------------------------------------------|-------------------------------------------|-------------------------------------------|
| Neighborhood-Level | Population density*              | <b>0.06</b><br>( <b>0.04 to 0.08</b> )    | <b>0.78</b><br>( <b>0.56 to 0.99</b> )    | <b>0.54</b><br>( <b>0.39 to 0.68</b> )    | <b>0.38</b><br>( <b>0.05 to 0.70</b> )    | <b>-0.50</b><br>( <b>-0.68 to -0.31</b> ) | -0.06<br>(-0.14 to 0.01)                  |
|                    | Education*                       | <b>0.64</b><br>( <b>0.61 to 0.67</b> )    | <b>0.86</b><br>( <b>0.77 to 0.96</b> )    | <b>1.12</b><br>( <b>0.96 to 1.27</b> )    | <b>1.07</b><br>( <b>0.70 to 1.47</b> )    | <b>1.06</b><br>( <b>0.92 to 1.19</b> )    | <b>0.58</b><br>( <b>0.53 to 0.63</b> )    |
|                    | Intersection density*            | 0.02<br>(-0.01 to 0.04)                   | <b>0.72</b><br>( <b>0.29 to 1.16</b> )    | <b>2.39</b><br>( <b>1.93 to 2.86</b> )    | <b>-0.62</b><br>( <b>-0.99 to -0.24</b> ) | <b>0.06</b><br>( <b>0.03 to 0.09</b> )    | <b>-0.19</b><br>( <b>-0.25 to -0.13</b> ) |
|                    | Greenness*                       | <b>-2.22</b><br>( <b>-2.25 to -2.19</b> ) | <b>-2.56</b><br>( <b>-2.68 to -2.44</b> ) | <b>-1.81</b><br>( <b>-1.94 to -1.68</b> ) | <b>-1.87</b><br>( <b>-2.12 to -1.60</b> ) | <b>-2.13</b><br>( <b>-2.32 to -1.94</b> ) | <b>-2.33</b><br>( <b>-2.38 to -2.29</b> ) |
|                    | Distance from city center*       | <b>-0.87</b><br>( <b>-0.90 to -0.85</b> ) | <b>-0.71</b><br>( <b>-0.78 to -0.64</b> ) | <b>-0.81</b><br>( <b>-0.88 to -0.74</b> ) | <b>-2.60</b><br>( <b>-2.97 to -2.24</b> ) | <b>-0.56</b><br>( <b>-0.76 to -0.37</b> ) | <b>-0.84</b><br>( <b>-0.87 to -0.81</b> ) |
| City-level         | Population density*              | <b>0.34</b><br>( <b>0.06 to 0.63</b> )    | -0.13<br>(-0.55 to 0.29)                  | -0.87<br>(-3.32 to 1.58)                  | -0.93<br>(-2.15 to 0.31)                  | <b>1.63</b><br>( <b>0.91 to 2.35</b> )    | -0.09<br>(-0.56 to 0.37)                  |
|                    | Education*                       | 0.05<br>(-0.33 to 0.42)                   | 0.00<br>(-0.5 to 0.51)                    | 0.19<br>(-1.91 to 2.28)                   | 0.63<br>(-2.77 to 4.04)                   | <b>3.32</b><br>( <b>0.19 to 6.45</b> )    | -0.43<br>(-0.90 to 0.03)                  |
|                    | Intersection density*            | 0.08<br>(-0.15 to 0.30)                   | 0.20<br>(-0.19 to 0.58)                   | 0.22<br>(-1.14 to 1.57)                   | 0.21<br>(-0.91 to 1.30)                   | <b>-1.14</b><br>( <b>-1.95 to -0.34</b> ) | 0.13<br>(-0.14 to 0.41)                   |
|                    | Greenness/vegetation*            | 0.08<br>(-0.14 to 0.30)                   | -0.09<br>(-0.74 to 0.56)                  | 0.29<br>(-0.25 to 0.83)                   | 0.27<br>(-0.12 to 0.66)                   | 3.61<br>(-0.17 to 7.39)                   | -0.01<br>(-0.28 to 0.25)                  |
|                    | Population size*                 | <b>0.31</b><br>( <b>0.11 to 0.51</b> )    | <b>0.34</b><br>( <b>0.09 to 0.59</b> )    | 0.37<br>(-0.09 to 0.84)                   | <b>3.03</b><br>( <b>2.20 to 3.85</b> )    | <b>-1.85</b><br>( <b>-3.52 to -0.19</b> ) | 0.02<br>(-0.28 to 0.32)                   |
|                    | GDP*                             | -0.04<br>(-0.23 to 0.16)                  | 0.09<br>(-0.28 to 0.47)                   | -0.29<br>(-1.57 to 1.00)                  | 0.12<br>(-0.41 to 0.67)                   | 0.05<br>(-2.2 to 2.29)                    | -0.06<br>(-0.25 to 0.13)                  |
|                    | Congestion*                      | <b>0.55</b><br>( <b>0.23 to 0.87</b> )    | 0.17<br>(-0.47 to 0.8)                    | 0.45<br>(-1.94 to 2.85)                   | 0.30<br>(-0.69 to 1.30)                   | 1.03<br>(-0.11 to 2.17)                   | <b>1.11</b><br>( <b>0.56 to 1.67</b> )    |

\*All independent variables have been z-transformed using the distribution of all study neighborhoods or cities, respectively. Estimates in bold font represent coefficients with statistical significance of  $p < 0.05$ .

**Supplemental Figure S1: Difference in neighborhood NO<sub>2</sub> ppbv per unit higher z-score for each covariate, comparing main analysis (using available data closest to 2019) with sensitivity analysis (using available data closest to census year).** Vertical and horizontal lines indicate 95% confidence intervals.

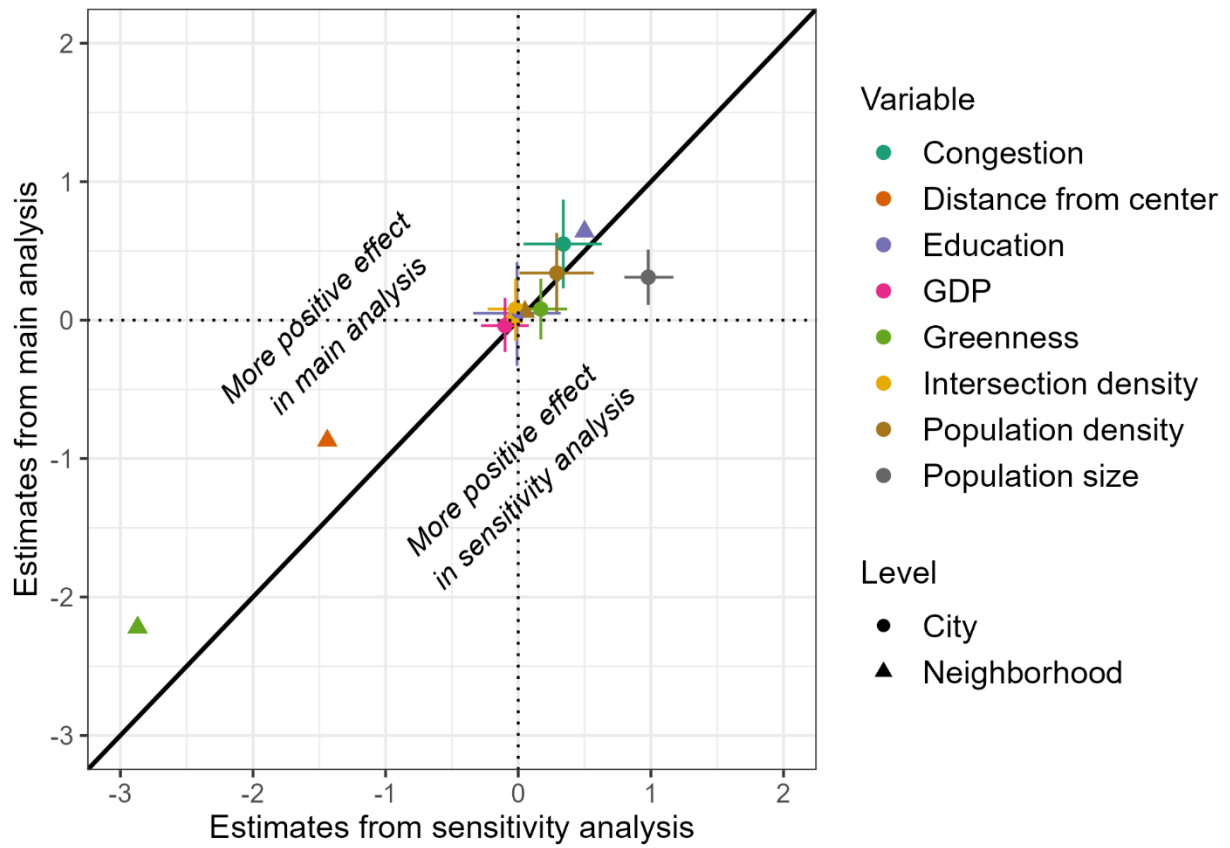

**Supplemental Figure S2: Spearman correlation coefficients between variables in multilevel analysis of associations between neighborhood NO<sub>2</sub> and features of the urban environment.**

| NO <sub>2</sub>      | Neighb. pop. density | Neighb. educ. | Neighb. int. density | Neighb. green | Neighb. distance | City pop. density | City educ.   | City int. density | City green   | City pop. size | City GDP     | City congestion |
|----------------------|----------------------|---------------|----------------------|---------------|------------------|-------------------|--------------|-------------------|--------------|----------------|--------------|-----------------|
| NO <sub>2</sub>      | Corr: 0.229          | Corr: 0.327   | Corr: 0.202          | Corr: -0.662  | Corr: -0.292     | Corr: 0.171       | Corr: 0.197  | Corr: 0.185       | Corr: -0.226 | Corr: 0.293    | Corr: 0.082  | Corr: 0.247     |
| Neighb. pop. density |                      | Corr: -0.012  | Corr: 0.131          | Corr: -0.178  | Corr: -0.091     | Corr: 0.248       | Corr: 0.067  | Corr: 0.051       | Corr: 0.060  | Corr: 0.153    | Corr: 0.033  | Corr: 0.263     |
| Neighb. educ.        |                      |               | Corr: 0.107          | Corr: -0.418  | Corr: -0.128     | Corr: -0.235      | Corr: 0.433  | Corr: -0.006      | Corr: -0.236 | Corr: 0.133    | Corr: 0.128  | Corr: -0.113    |
| Neighb. int. density |                      |               |                      | Corr: -0.198  | Corr: -0.122     | Corr: 0.147       | Corr: 0.109  | Corr: 0.174       | Corr: -0.012 | Corr: 0.006    | Corr: -0.032 | Corr: 0.076     |
| Neighb. green        |                      |               |                      |               | Corr: 0.185      | Corr: 0.107       | Corr: -0.299 | Corr: -0.183      | Corr: 0.517  | Corr: -0.198   | Corr: -0.138 | Corr: -0.022    |
| Neighb. distance     |                      |               |                      |               |                  | Corr: 0.005       | Corr: 0.092  | Corr: -0.142      | Corr: -0.091 | Corr: 0.309    | Corr: 0.149  | Corr: 0.080     |
| City pop. density    |                      |               |                      |               |                  |                   | Corr: 0.149  | Corr: 0.220       | Corr: 0.329  | Corr: 0.336    | Corr: -0.045 | Corr: 0.720     |
| City educ.           |                      |               |                      |               |                  |                   |              | Corr: 0.119       | Corr: -0.293 | Corr: 0.268    | Corr: 0.259  | Corr: 0.350     |
| City int. density    |                      |               |                      |               |                  |                   |              |                   | Corr: -0.132 | Corr: -0.192   | Corr: -0.095 | Corr: 0.094     |
| City green           |                      |               |                      |               |                  |                   |              |                   |              | Corr: -0.031   | Corr: -0.077 | Corr: 0.210     |
| City pop. size       |                      |               |                      |               |                  |                   |              |                   |              |                | Corr: 0.268  | Corr: 0.507     |
| City GDP             |                      |               |                      |               |                  |                   |              |                   |              |                |              | Corr: 0.110     |
| City congestion      |                      |               |                      |               |                  |                   |              |                   |              |                |              |                 |

## Appendix I: Detailed descriptions of urban environmental measures and their interpretation

**Population (neighborhood/city).** Number of residents reported by most recent available national census (see Supplemental Table S1 for census year for each country).

**Population Density (neighborhood/city).** Population (in thousands) per square kilometer of neighborhood/city area. Population sourced from national censuses.

**Educational attainment (neighborhood/city).** Percent of the population aged 25 years or older who completed primary education or above. Sourced from national censuses.

**Intersection Density (neighborhood/city).** The number of intersections per area of city/neighborhood built-up area in square kilometers. Intersections were extracted from street network OpenStreetMap data and included any intersections with >2 connected streets (i.e., cul-de-sacs and road bends represented as a node were excluded). Neighborhood and city indices represent the years of 2020 and 2017, respectively.

**Greenness (neighborhood/city).** Area median greenness measured by the normalized difference vegetation index (NDVI). NDVI was calculated using MODIS satellite-based observations from the MODIS vegetation product, MOD13Q1.006 for 2015 at a 250 m spatial resolution. We computed the maximum NDVI value for 2019 at 250 m resolution to present the ‘greenest’ condition of each grid cell within the year, then calculated the median across grid cells contained within each neighborhood.

**Distance from city center (neighborhood).** Euclidean distance in km between the neighborhood centroid and city hall, based on neighborhood boundaries at time of census.

**Gross Domestic Product per Capita (city).** City-level GDP in 2011 international US Dollars. Created by Genaioli et al in 2013 and converted into gridded estimates by Kummum et al in 2015. GDP for each year 1990-2015 was estimated by these researchers by modeling data from government, survey and industry. Gridded estimates were matched to SALURBAL cities and GDP was extracted directly from matching administrative units or using population-weighted averages in cases where city boundaries crossed multiple administrative areas. GDP estimates from 2015 (most recent year available) were used.

Genaioli N, La Porta R, Lopez-de-Silanes F, Shleifer A, Human Capital and Regional Development, The Quarterly Journal of Economics, Volume 128, Issue 1, February 2013, Pages 105–164, <https://doi.org/10.1093/qje/qjs050>.

Kummum M, Taka M, & Guillaume J. Gridded global datasets for Gross Domestic Product and Human Development Index over 1990–2015. Sci Data 5, 180004 (2018). <https://doi.org/10.1038/sdata.2018.4>.

**Traffic congestion index (city).** The increase in travel times due to congestion in the street network. Data sources: The street network was obtained from OpenStreetMap and the travel times from the Google Maps Distance Matrix API. The index for each area unit is approximated by measuring delays for 30 random origin-destination pairs in the street network and seven points in time during peak hours of a typical weekday in 2018. Operationalized as the percent longer trip duration due to traffic congestion, as a percentage of trip time without congestion (possible range, 0 to infinity).
